# Supplementary material for: Trans-keto* form detection in non photochromic N-salicylidene aminomethylpyridines
Source: Royal Society of Chemistry journal article supplement (doi:10.1039/c2ce00006g), 2012-01-01

ESI

## Trans-keto\* form detection in non photochromic *N*-salicylidene aminomethylpyridines†‡

François Robert,<sup>a</sup> Pierre-Loïc Jacquemin,<sup>a</sup> Bernard Tinant,<sup>a</sup> and Yann Garcia\*<sup>a</sup>

Fig. S1 X-ray powder diffractograms of  $\text{CH}_2\text{L}^3\text{Cl}$  (solid) and  $\text{CH}_2\text{L}^4\text{Cl}$  (dashed)

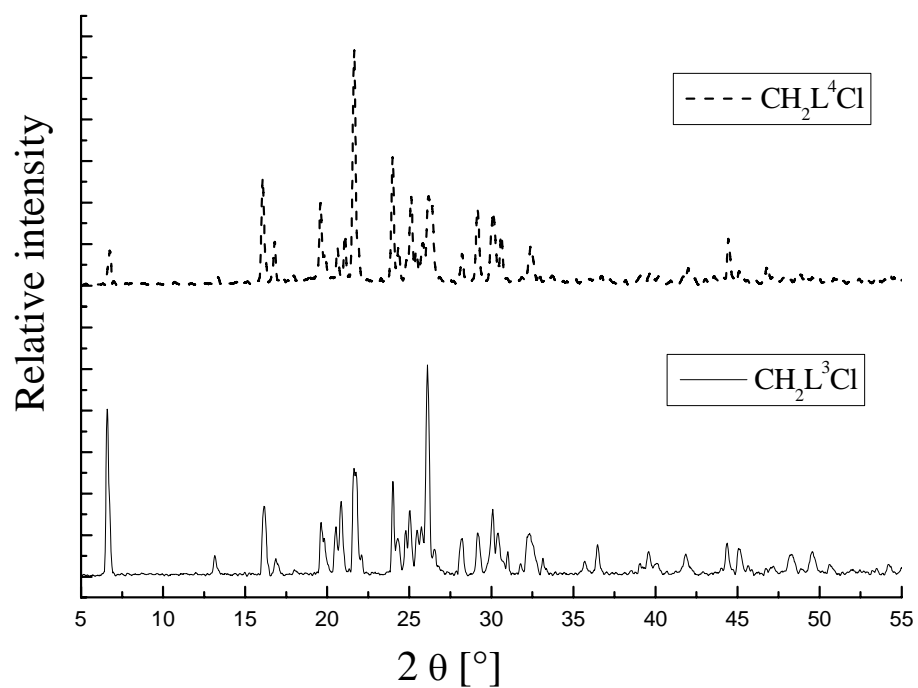

Supplement: c2ce00006g.pdf [file c2ce00006g.pdf]
